# Supplementary material for: Flexible small-channel thin-film transistors by electrohydrodynamic lithography
Source: Royal Society of Chemistry journal article supplement (doi:10.1039/c7nr06075k), 2017-01-01
Supplement: c7nr06075k1.pdf [file c7nr06075k1.pdf]

## Supporting Information

### Flexible Small-Channel Thin-Film Transistors by Electrohydrodynamic Lithography

Yajiang Ding,<sup>a,b</sup> Chen Zhu,<sup>a,b</sup> Jianpeng Liu,<sup>a,b</sup> Yongqing Duan,<sup>a,b</sup> Zhengran Yi,<sup>c</sup> Jian Xiao,<sup>c</sup>  
Shuai Wang,<sup>a,c</sup> YongAn Huang<sup>a,b,\*</sup> and Zhouping Yin<sup>a,b,\*</sup>

<sup>a</sup> State Key Laboratory of Digital Manufacturing Equipment and Technology, Huazhong University of Science and Technology, Wuhan, 430074, China

<sup>b</sup> Flexible Electronics Research Center, Huazhong University of Science and Technology, Wuhan, 430074, China

<sup>c</sup> School of Chemistry and Chemical Engineering, Huazhong University of Science and Technology, Wuhan, 430074, China

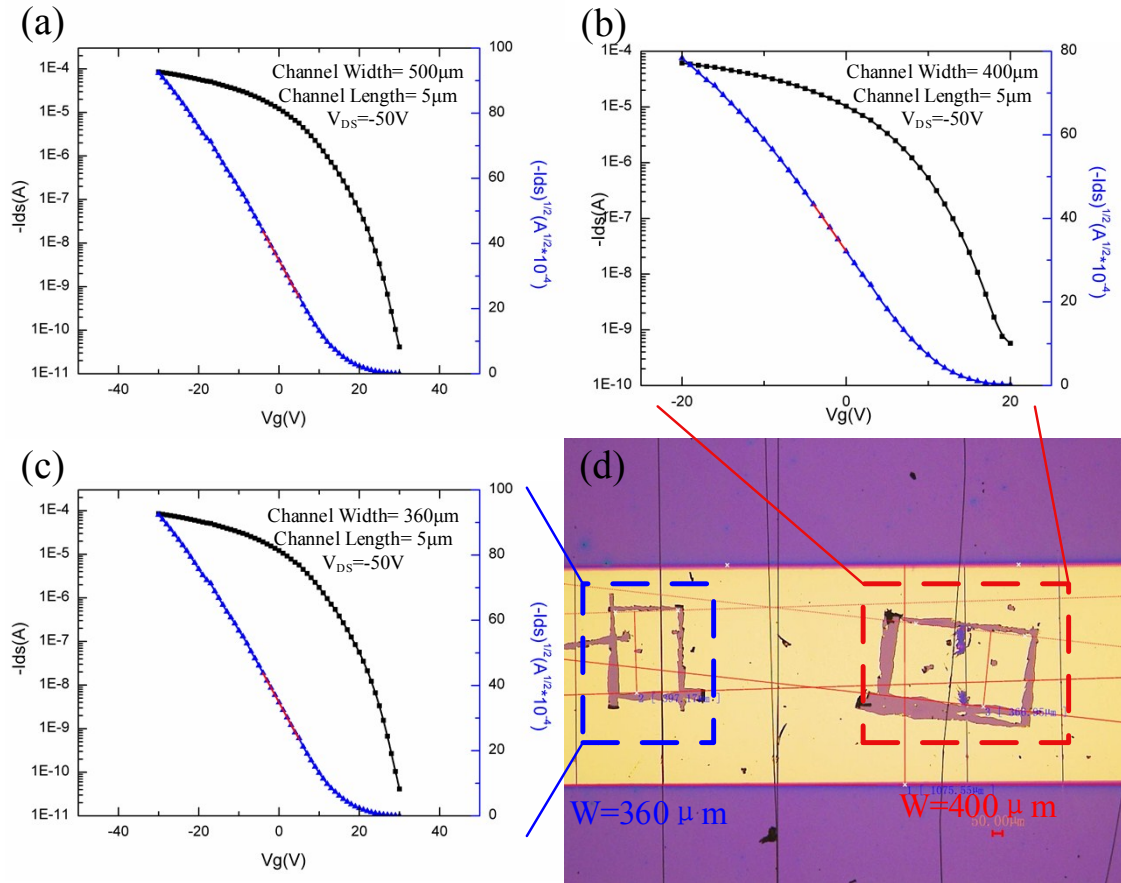

**Fig. S1.** TFT performance characteristics. (a) Transfer characteristics of devices with the continuous channel layer at source/drain voltage ( $V_{DS}$ ) of -50 V. (b) and (c) Transfer characteristics of devices with the isolated channel layer at source/drain voltage ( $V_{DS}$ ) of -50 V. (d) The laser scanning confocal microscope (LSCM) image of the TFTs with the isolated channel layer.

**Text S1**

The contact resistance is the resistance between the source/drain electrodes and the semiconductor layer, and the value is not related to the channel length. In order to achieve the smaller contact resistance, we choose the gold for the source/drain electrodes and ensure that the interfaces between the electrodes and the semiconductor layer are as flat as possible.

The electrochemical properties of the thin film of PDPP5T were characterized with cyclic voltammetry (CV).<sup>1</sup> The HOMO level and the LUMO level of PDPP5T are calculated from the onset oxidation potential ( $\sim 0.32$  V) and the onset reduction potential ( $\sim -1.28$  V) to be  $-5.12$  eV and  $-3.55$  eV, respectively. The HOMO energy of PDPP5T very closely approaches the gold electrodes ( $-5.0$  eV), which can greatly reduce the barrier between the two layers.

Meanwhile, the semiconductor layer is obtained on the substrate with OTS-18 SAM modification and the source/drain electrodes are deposited via thermal vacuum evaporation with the pressure under  $5.0 \times 10^{-5}$  Pa, which maintain the two layers having a low roughness. The AFM images of the dielectric layer and the semiconducting layer are obtained as Fig 1 shows. It is observed that the surface of the insulating layer is very flat and has a roughness of 0.34 nm. At the same time, the semiconducting layer has a higher roughness of 5.16 nm, for the layer is fabricated by spin-coating. In general, the morphologies of the layers are good enough to prepare high-performance electronic devices

The measures mentioned above can make the interface between the two layers have a good contact, which greatly reduces the contact resistance.

**References:**

[1] Yi Z, Sun X, Zhao Y, et al. Diketopyrrolopyrrole-based  $\pi$ -conjugated copolymer containing  $\beta$ -unsubstituted quintetthiophene unit: a promising material exhibiting high hole-mobility for organic thin-film transistors[J]. Chemistry of Materials, 2012, 24(22): 4350-4356.

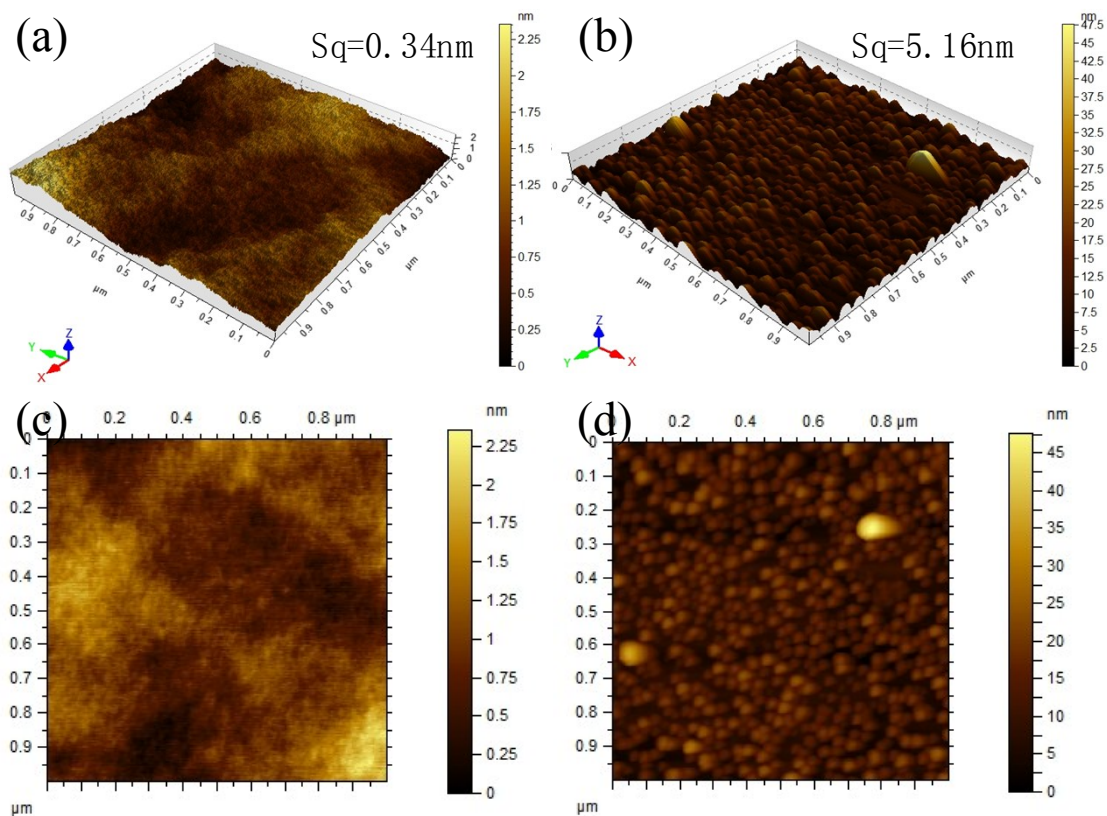

**Fig S2.** The 3D and 2D AFM images of the dielectric layer (a, c) and the semiconducting layer (b, d).

**Table S1.** The mobility and ON/OFF ratio of 75 OTFT devices.

| Sample No. | Mobility (cm <sup>2</sup> V <sup>-1</sup> s <sup>-1</sup> ) | ON/OFF ratio | Sample No. | Mobility (cm <sup>2</sup> V <sup>-1</sup> s <sup>-1</sup> ) | ON/OFF ratio | Sample No. | Mobility (cm <sup>2</sup> V <sup>-1</sup> s <sup>-1</sup> ) | ON/OFF ratio |
|------------|-------------------------------------------------------------|--------------|------------|-------------------------------------------------------------|--------------|------------|-------------------------------------------------------------|--------------|
| 1          | 0.18                                                        | 7.33e4       | 2          | 0.26                                                        | 1.97e5       | 3          | 0.39                                                        | 2.13e5       |
| 4          | 0.48                                                        | 2.01e6       | 5          | 0.19                                                        | 6.56e4       | 6          | 0.42                                                        | 1.97e5       |
| 7          | 0.26                                                        | 2.47e5       | 8          | 0.45                                                        | 4.73e5       | 9          | 0.51                                                        | 6.92e5       |
| 10         | 0.36                                                        | 3.45e5       | 11         | 0.17                                                        | 4.22e4       | 12         | 0.22                                                        | 1.24e5       |
| 13         | 0.22                                                        | 6.41e4       | 14         | 0.56                                                        | 1.97e6       | 15         | 0.20                                                        | 1.46e5       |
| 16         | 0.23                                                        | 5.94e4       | 17         | 0.28                                                        | 9.82e4       | 18         | 0.39                                                        | 2.85e5       |
| 19         | 0.34                                                        | 7.28e5       | 20         | 0.62                                                        | 2.47e6       | 21         | 0.35                                                        | 5.27e5       |
| 22         | 0.37                                                        | 2.96e5       | 23         | 0.24                                                        | 9.57e4       | 24         | 0.19                                                        | 5.87e4       |
| 25         | 0.49                                                        | 7.24e5       | 26         | 0.32                                                        | 3.87e5       | 27         | 0.37                                                        | 2.86e5       |
| 28         | 0.29                                                        | 6.59e4       | 29         | 0.36                                                        | 2.67e5       | 30         | 0.28                                                        | 2.45e5       |
| 31         | 0.18                                                        | 5.82e4       | 32         | 0.11                                                        | 3.47e4       | 33         | 0.41                                                        | 8.89e5       |
| 34         | 0.42                                                        | 6.59e5       | 35         | 0.20                                                        | 1.46e5       | 36         | 0.46                                                        | 5.71e5       |
| 37         | 0.52                                                        | 1.97e6       | 38         | 0.30                                                        | 5.63e5       | 39         | 0.39                                                        | 4.03e5       |
| 40         | 0.41                                                        | 6.48e5       | 41         | 0.51                                                        | 8.47e5       | 42         | 0.39                                                        | 4.15e5       |
| 43         | 0.27                                                        | 7.86e5       | 44         | 0.16                                                        | 7.14e4       | 45         | 0.41                                                        | 3.68e5       |
| 46         | 0.47                                                        | 8.33e5       | 47         | 0.27                                                        | 3.11e5       | 48         | 0.49                                                        | 9.21e5       |
| 49         | 0.44                                                        | 8.25e5       | 50         | 0.52                                                        | 1.82e6       | 52         | 0.40                                                        | 3.57e5       |
| 52         | 0.58                                                        | 1.53e6       | 53         | 0.29                                                        | 2.19e5       | 54         | 0.26                                                        | 7.27e4       |
| 55         | 0.34                                                        | 3.55e5       | 56         | 0.45                                                        | 2.69e5       | 57         | 0.34                                                        | 2.80e5       |
| 58         | 0.35                                                        | 5.33e5       | 59         | 0.54                                                        | 6.56e5       | 60         | 0.23                                                        | 6.46e4       |
| 61         | 0.18                                                        | 6.94e4       | 62         | 0.44                                                        | 5.49e5       | 63         | 0.44                                                        | 4.37e5       |
| 64         | 0.26                                                        | 3.51e5       | 65         | 0.28                                                        | 2.32e5       | 66         | 0.55                                                        | 7.81e5       |
| 67         | 0.50                                                        | 6.94e5       | 68         | 0.29                                                        | 1.34e5       | 69         | 0.27                                                        | 7.26e4       |
| 70         | 0.22                                                        | 7.52e5       | 71         | 0.22                                                        | 8.75e4       | 72         | 0.39                                                        | 6.92e5       |
| 73         | 0.20                                                        | 3.26e5       | 74         | 0.42                                                        | 5.43e5       | 75         | 0.31                                                        | 2.97e5       |

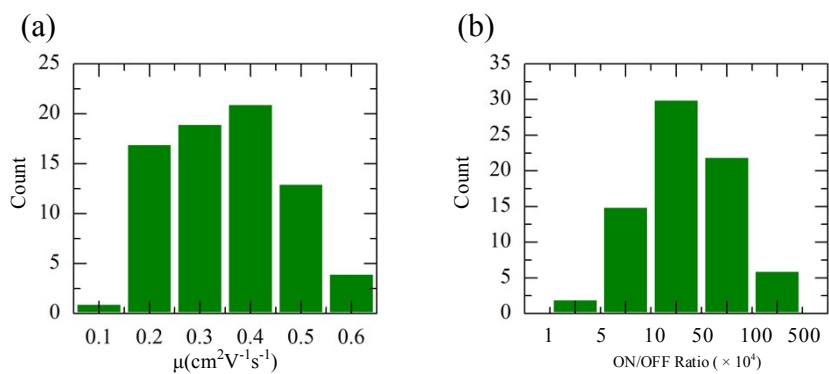

**Fig. S3.** The normal distribution of TFT performance characteristics of OTFT devices: the mobility (a) and the ON/OFF ratio (b).
